# Supplementary material for: Specific down-regulation of spermatogenesis genes targeted by 22G RNAs in hybrid sterile males associated with an X-Chromosome introgression
Source: HighWire-hosted journal article supplement (doi:10.1101/gr.204479.116), 2016-05-18
Supplement: Supplemental_Table_S6.xlsx [file Supplemental_Table_S6.xlsx]

## Sheet: Supplemental_tab_22GRNAs_sperm.
Table S6 Normalized expression (RPM) of 22G RNAs with significant upregulation in hybrid ZZY10330 than in C. nigoni (JU1421)
Wormbase ID	Public_name	Molecular_name	Linkage group	C. nigoni_transcript_assembly	JU1421_22G_rpm	Hybrid(ZZY10330)_22G_rpm
WBGene00041659		CBG23275	A	c91_g1_i1	12.3132	42.3169
WBGene00025788		CBG02807	A	c133_g1_i1	34.8875	84.6339
WBGene00026211	Cbr-acl-13	CBG03331	A	c212_g1_i1	41.0442	84.6339
WBGene00026069		CBG03147	A	c262_g1_i1	16.4177	67.7071
WBGene00035602		CBG15295	A	c425_g1_i1	18.4699	50.7803
WBGene00038897		CBG19727	A	c639_g1_i1	4.10442	16.9268
WBGene00025590		CBG02558	A	c672_g1_i1	20.5221	42.3169
WBGene00033988	Cbr-wht-8	CBG13191	A	c1269_g1_i1	12.3132	118.487
WBGene00041089		CBG22554	A	c1288_g1_i1	18.4699	42.3169
WBGene00087315		CBG25901	A	c1372_g1_i1	12.3132	67.7071
WBGene00033477		CBG12539	A	c1772_g1_i1	12.3132	33.8535
WBGene00041076		CBG22538	A	c2000_g1_i1	49.253	245.438
WBGene00042177		CBG23947	A	c2025_g1_i1	51.3052	126.951
WBGene00027197		CBG04552	A	c2211_g1_i1	2.05221	16.9268
WBGene00032092		CBG10823	A	c2289_g1_i1	38.992	160.804
WBGene00032092		CBG10823	A	c2289_g1_i1	38.992	160.804
WBGene00028229		CBG05860	A	c2364_g1_i1	28.7309	67.7071
WBGene00023963	Cbr-svop-1	CBG00590	A	c2517_g1_i1	45.1486	110.024
WBGene00030659		CBG08981	A	c3180_g1_i1	8.20883	42.3169
WBGene00032328		CBG11159	A	c3482_g1_i1	18.4699	59.2437
WBGene00026950		CBG04232	A	c3530_g1_i1	41.0442	118.487
WBGene00034020		CBG13229	A	c4046_g1_i1	10.261	101.561
WBGene00038876	Cbr-ddo-3	CBG19702	A	c4373_g1_i1	2.05221	33.8535
WBGene00024827		CBG01613	A	c4504_g1_i1	43.0964	186.195
WBGene00026162		CBG03271	A	c4620_g1_i1	12.3132	84.6339
WBGene00030878		CBG09262	A	c5602_g1_i1	75.9317	228.511
WBGene00039211		CBG20156	A	c5801_g1_i1	28.7309	76.1705
WBGene00032967		CBG11946	A	c6400_g1_i1	30.7831	67.7071
WBGene00023838		CBG00453	A	c6424_g1_i1	20.5221	59.2437
WBGene00033352		CBG12397	A	c6497_g1_i1	51.3052	262.365
WBGene00025729	Cbr-snf-5	CBG02728	A	c7044_g1_i1	24.6265	93.0973
WBGene00042475		CBG24340	A	c7202_g1_i1	24.6265	67.7071
WBGene00023535		CBG00020	A	c7600_g1_i1	12.3132	76.1705
WBGene00087912		CBG26498	A	c7690_g1_i1	18.4699	42.3169
WBGene00038135		CBG18783	A	c7714_g1_i1	2.05221	50.7803
WBGene00035844		CBG15695	A	c8032_g1_i1	8.20883	59.2437
WBGene00040768		CBG22145	A	c8672_g1_i1	36.9397	110.024
WBGene00027464		CBG04867	A	c8801_g1_i1	82.0883	186.195
WBGene00041944		CBG23637	A	c8966_g1_i1	2.05221	16.9268
WBGene00031481		CBG09992	A	c9047_g1_i1	65.6707	160.804
WBGene00033757		CBG12889	A	c9049_g1_i1	2.05221	16.9268
WBGene00026887		CBG04160	A	c9081_g1_i1	8.20883	42.3169
WBGene00026522		CBG03722	A	c9103_g1_i1	6.15662	16.9268
WBGene00039579		CBG20631	A	c9483_g1_i1	4.10442	25.3902
WBGene00033021		CBG12006	A	c10165_g1_i1	4.10442	16.9268
WBGene00041749		CBG23384	A	c10417_g1_i2	28.7309	59.2437
WBGene00040075		CBG21240	A	c10666_g1_i1	6.15662	25.3902
WBGene00042286		CBG24094	A	c10743_g1_i1	4.10442	16.9268
WBGene00032841	Cbr-wht-5	CBG11767	A	c10799_g1_i1	45.1486	93.0973
WBGene00026958		CBG04241	A	c10819_g1_i1	16.4177	42.3169
WBGene00025647		CBG02628	A	c10902_g2_i1	2.05221	59.2437
WBGene00038892		CBG19720	A	c10942_g1_i1	6.15662	42.3169
WBGene00030646		CBG08965	A	c10982_g1_i1	51.3052	253.902
WBGene00087013		CBG25599	A	c10995_g1_i1	16.4177	719.388
WBGene00086806		CBG25392	A	c11140_g1_i1	20.5221	101.561
WBGene00033434		CBG12489	A	c11378_g1_i1	28.7309	76.1705
WBGene00035597		CBG15287	A	c11692_g1_i2	110.819	236.975
WBGene00026021		CBG03087	A	c11789_g1_i1	10.261	25.3902
WBGene00038641	Cbr-anmt-3	CBG19415	A	c11823_g1_i1	14.3655	33.8535
WBGene00034202		CBG13435	A	c12010_g1_i1	12.3132	67.7071
WBGene00028971		CBG06738	A	c12620_g1_i2	137.498	516.267
WBGene00041441		CBG23007	A	c12625_g1_i1	4.10442	25.3902
WBGene00033376		CBG12423	A	c12654_g2_i1	12.3132	25.3902
WBGene00024251		CBG00946	A	c13051_g1_i2	2.05221	16.9268
WBGene00033552		CBG12634	A	c13183_g1_i1	77.9839	338.535
WBGene00035365		CBG15004	A	c13370_g2_i1	8.20883	16.9268
WBGene00035792		CBG15624	A	c13618_g1_i1	2.05221	67.7071
WBGene00040064		CBG21223	A	c13658_g1_i1	262.683	905.582
WBGene00042585		CBG24488	A	c13693_g1_i1	73.8795	169.268
WBGene00025822		CBG02852	A	c13713_g1_i1	24.6265	126.951
WBGene00038218		CBG18912	A	c13862_g1_i1	41.0442	93.0973
WBGene00026785		CBG04039	A	c13903_g2_i5	8.20883	50.7803
WBGene00024911		CBG01719	A	c14241_g2_i1	65.6707	228.511
WBGene00039310	Cbr-abt-5	CBG20290	A	c14431_g3_i1	10.261	25.3902
WBGene00030109	Cbr-nape-2	CBG08290	A	c14608_g1_i3	12.3132	25.3902
WBGene00030087		CBG08261	A	c14682_g2_i1	133.394	372.389
WBGene00030087		CBG08261	A	c14682_g2_i1	133.394	372.389
WBGene00028487		CBG06177	A	c14725_g2_i5	2.05221	16.9268
WBGene00038927	Cbr-mpst-6	CBG19760	A	c14768_g1_i1	14.3655	228.511
WBGene00039890		CBG20999	A	c14809_g1_i1	18.4699	42.3169
WBGene00032309		CBG11137	A	c14930_g1_i1	2.05221	16.9268
WBGene00032309		CBG11137	A	c14930_g1_i1	2.05221	16.9268
WBGene00031369		CBG09853	A	c15015_g1_i1	84.1405	228.511
WBGene00033418		CBG12472	A	c15045_g1_i1	10.261	42.3169
WBGene00039395		CBG20411	A	c15058_g1_i1	14.3655	59.2437
WBGene00024860		CBG01656	A	c15065_g1_i1	6.15662	25.3902
WBGene00024769		CBG01546	A	c15624_g1_i1	71.8273	228.511
WBGene00087395		CBG25981	A	c15751_g1_i1	8.20883	42.3169
WBGene00026569		CBG03783	A	c18390_g1_i1	8.20883	67.7071
WBGene00026393		CBG03550	A	c18409_g1_i1	12.3132	42.3169
WBGene00040884	Cbr-spe-15	CBG22283	A	c18411_g1_i1	51.3052	110.024
WBGene00040884	Cbr-spe-15	CBG22283	A	c18411_g1_i1	51.3052	110.024
WBGene00025520		CBG02472	A	c18421_g1_i1	8.20883	42.3169
WBGene00025764		CBG02774	A	c18456_g1_i1	34.8875	160.804
WBGene00026461		CBG03643	A	c18474_g1_i1	4.10442	42.3169
WBGene00041381		CBG22933	A	c18503_g1_i1	125.185	253.902
WBGene00032349		CBG11186	A	c18512_g1_i1	12.3132	287.755
WBGene00026932	Cbr-gska-3	CBG04212	A	c18521_g1_i1	38.992	118.487
WBGene00034543		CBG13849	A	c18587_g1_i1	238.056	1184.87
WBGene00037902		CBG18491	A	c18651_g1_i1	6.15662	50.7803
WBGene00037222		CBG17655	A	c18683_g1_i1	6.15662	16.9268
WBGene00037651		CBG18186	A	c18823_g1_i1	43.0964	296.219
WBGene00033086		CBG12081	A	c19221_g1_i1	2.05221	25.3902
WBGene00025581		CBG02546	A	c19307_g1_i1	10.261	110.024
WBGene00026894		CBG04167	A	c22071_g1_i1	10.261	25.3902
WBGene00025302		CBG02216	A	c22076_g1_i1	24.6265	93.0973
WBGene00030917		CBG09313	A	c22083_g1_i1	67.7229	220.048
WBGene00086670		CBG25256	A	c22085_g1_i1	4.10442	16.9268
WBGene00086670		CBG25256	A	c22085_g1_i1	4.10442	16.9268
WBGene00034159		CBG13383	A	c22114_g1_i1	4.10442	42.3169
WBGene00034159		CBG13383	A	c22114_g1_i1	4.10442	42.3169
WBGene00030301	Cbr-cyc-2.2	CBG08529	A	c22140_g1_i1	8.20883	59.2437
WBGene00025598		CBG02570	A	c22225_g1_i1	20.5221	50.7803
WBGene00026973		CBG04260	A	c22249_g1_i1	38.992	84.6339
WBGene00040767		CBG22144	A	c22268_g1_i1	77.9839	186.195
WBGene00033395		CBG12448	A	c22352_g1_i1	8.20883	16.9268
WBGene00028385		CBG06045	A	c22368_g1_i1	51.3052	211.585
WBGene00029228		CBG07060	A	c22450_g1_i1	34.8875	101.561
WBGene00025848	Cbr-twk-5	CBG02879	A	c22473_g1_i1	190.855	406.243
WBGene00025848	Cbr-twk-5	CBG02879	A	c22473_g1_i1	190.855	406.243
WBGene00040065		CBG21224	A	c22592_g1_i1	14.3655	33.8535
WBGene00026905		CBG04178	A	c22680_g1_i1	67.7229	203.121
WBGene00032658		CBG11554	A	c25609_g1_i1	6.15662	76.1705
WBGene00039360		CBG20357	A	c25658_g1_i1	47.2008	203.121
WBGene00033396		CBG12449	A	c25720_g1_i1	26.6787	93.0973
WBGene00026772	Cbr-rmd-6	CBG04024	A	c25761_g1_i1	2.05221	33.8535
WBGene00033294	Cbr-spe-11	CBG12332	A	c25810_g1_i1	22.5743	50.7803
WBGene00027072		CBG04390	A	c25825_g1_i1	2.05221	25.3902
WBGene00026501		CBG03696	A	c25960_g1_i1	38.992	93.0973
WBGene00088869		CBG27455	A	c26043_g1_i1	28.7309	93.0973
WBGene00042053		CBG23791	A	c26148_g1_i1	45.1486	110.024
WBGene00028567		CBG06264	A	c26724_g1_i1	14.3655	33.8535
WBGene00030498		CBG08760	A	c29279_g1_i1	4.10442	33.8535
WBGene00030498		CBG08760	A	c29279_g1_i1	4.10442	33.8535
WBGene00033586		CBG12671	A	c29280_g1_i1	260.63	1049.46
WBGene00041871		CBG23535	A	c29286_g1_i1	4.10442	42.3169
WBGene00039117		CBG20013	A	c29291_g1_i1	82.0883	211.585
WBGene00026612		CBG03833	A	c29309_g1_i1	2.05221	16.9268
WBGene00033624		CBG12718	A	c29326_g1_i1	84.1405	262.365
WBGene00026636		CBG03865	A	c29335_g1_i1	12.3132	25.3902
WBGene00027012		CBG04310	A	c29509_g1_i1	69.7751	245.438
WBGene00026881		CBG04150	A	c29550_g1_i1	2.05221	16.9268
WBGene00037621		CBG18149	A	c29589_g1_i1	2.05221	42.3169
WBGene00034304		CBG13553	A	c32777_g1_i1	162.124	804.022
WBGene00039320		CBG20303	A	c32813_g1_i1	6.15662	16.9268
WBGene00033383	Cbr-spe-46	CBG12430	A	c32834_g1_i1	2.05221	16.9268
WBGene00029275		CBG07119	A	c32880_g1_i1	18.4699	42.3169
WBGene00035544		CBG15225	A	c32908_g1_i1	4.10442	59.2437
WBGene00030073		CBG08242	A	c32982_g1_i1	34.8875	93.0973
WBGene00035896		CBG15751	A	c33103_g1_i1	4.10442	16.9268
WBGene00026395		CBG03552	A	c33123_g1_i1	24.6265	67.7071
WBGene00038526		CBG19279	A	c33136_g1_i1	24.6265	84.6339
WBGene00035303	Cbr-elo-8	CBG14929	A	c33254_g1_i1	4.10442	67.7071
WBGene00039770		CBG20859	A	c33361_g1_i1	20.5221	76.1705
