# Supplementary material for: Specific down-regulation of spermatogenesis genes targeted by 22G RNAs in hybrid sterile males associated with an X-Chromosome introgression
Source: HighWire-hosted journal article supplement (doi:10.1101/gr.204479.116), 2016-05-18
Supplement: Supplemental_Table_S7.xlsx [file Supplemental_Table_S7.xlsx]

## Sheet: Sheet1
Table S7 miRNAs with sequence differences between C. nigoni and C. briggsae with >20 reads/million miRNAs
	C. briggsae	C. nigoni	Linkage group	Remarks
miR-73b	TGGCAAGATGTTGGCAGTCGCAT	TGGCAAGATGTTGGCAGTCGGAT	I
miR-1817	CAGCCAATGCCACGACTGTCATG	TAGCCAATGTCACGACTGTCATG	I
miR-40	TCACCGGGTGTCAATCAGCTAG	TCACCGGGTGTAAATCAGCTAG	II
miR-787	TAAGCTCGTCTTAGTTTTCCTCT	TAAGCTCGTCTTAGTTTTCTTCT	X
miR-55	TACCCGTATATTTTTCTGCCGAG	TACCCGTATATTTTTCTGCTGAG	X	within introgression ZZY10330
miR-237	TCCCTGAGAATGCTCCGACATCT	TCCCTGAGAATGCTCTGACATCT	X	within introgression ZZY10330
# bold text shows the single nucleotide polymorphism (SNP) in C. nigoni versus C. briggsae
