# Supplementary material for: Specific down-regulation of spermatogenesis genes targeted by 22G RNAs in hybrid sterile males associated with an X-Chromosome introgression
Source: HighWire-hosted journal article supplement (doi:10.1101/gr.204479.116), 2016-05-18
Supplement: Supplemental_Table_S8.xlsx [file Supplemental_Table_S8.xlsx]

## Sheet: miRNA_table_corrected_norm.txt
Table S8. Normalized expression of C. briggsae miRNAs and its orthologs in C. nigoni (JU1421) and hybrid (ZZY10330)
Name	miRbase accession	AF16 (RPM)	ZZY10330 (RPM)	JU1421(RPM)
cbr-miR-57	MIMAT0000477	200560	176068	80950.3
cbr-miR-228	MIMAT0000495	136147	120359	99103.4
cbr-miR-80	MIMAT0000487	131943	153031	105862
cbr-miR-82	MIMAT0000489	123025	75046.4	37746.1
cbr-miR-81	MIMAT0000488	107711	65821.4	17891.9
cbr-miR-56-3p	MIMAT0011476	52311.8	41772.2	70048.1
cbr-miR-90b-3p	MIMAT0011472	42208.1	36461	26531.2
cbr-miR-90a	MIMAT0000493	31266.1	31548.1	15152.6
cbr-miR-45	MIMAT0000470	30643.7	24352.9	13955.1
cbr-miR-235b-3p	MIMAT0011474	25180.7	163875	42077.9
cbr-miR-58	MIMAT0000478	21477.4	22718.8	28346.6
cbr-miR-48	MIMAT0000473	15124	13163.8	22495.2
cbr-let-7	MIMAT0000463	14339.5	7989.23	8954.84
cbr-miR-50	MIMAT0000475	6279	6687.71	3887.14
cbr-miR-52	MIMAT0000476	5373.65	4380.47	5522.7
cbr-miR-238	MIMAT0011465	5070.15	5027.29	5649.09
cbr-miR-73b	MIMAT0011464	4649.84	8783.29	5833.52
cbr-miR-46	MIMAT0000471	4567.38	4627.63	3879.65
cbr-miR-55	MIMAT0001310	4009.62	2344.05	490.574
cbr-miR-73a	MIMAT0000482	3564.11	4022.88	3145.66
cbr-miR-237-5p	MIMAT0011479	3209.65	1301.52	363018
cbr-miR-86	MIMAT0000491	2864.35	2493.92	1812.5
cbr-miR-47	MIMAT0000472	2773.87	2397.95	4211.07
cbr-miR-236	MIMAT0000500	2566	3293.24	2599.85
cbr-miR-74b-5p	MIMAT0011501	2530.5	1684.09	1377.16
cbr-miR-1	MIMAT0000465	2513.89	4281.87	5502.1
cbr-miR-2226-5p	MIMAT0011499	1948.69	1193.72	1071.02
cbr-miR-241	MIMAT0000501	1944.11	1256.82	566.407
cbr-lin-4	MIMAT0000464	1876.54	1952.28	2380.78
cbr-miR-245	MIMAT0000503	1443.63	1950.97	2325.54
cbr-miR-785	MIMAT0004286	1256.94	713.864	524.277
cbr-miR-244	MIMAT0000502	1081.72	667.851	513.043
cbr-miR-51	MIMAT0001297	901.335	911.064	1156.22
cbr-miR-71	MIMAT0000481	838.345	1171.37	7062.76
cbr-miR-79	MIMAT0000486	734.124	533.755	550.491
cbr-miR-64a	MIMAT0001292	715.227	535.069	526.15
cbr-miR-65-3p	MIMAT0011485	656.245	608.691	832.29
cbr-miR-77	MIMAT0000485	535.991	255.045	322.056
cbr-miR-248	MIMAT0000504	400.275	468.021	386.655
cbr-miR-235a	MIMAT0004295	357.9	370.736	301.459
cbr-miR-233	MIMAT0000498	350.456	257.675	173.199
cbr-miR-231	MIMAT0001293	319.533	294.485	424.103
cbr-miR-242	MIMAT0004296	270.286	194.571	159.156
cbr-miR-34	MIMAT0000466	254.252	573.195	1593.43
cbr-miR-787	MIMAT0004288	229.056	168.277	261.202
cbr-miR-232	MIMAT0000497	203.287	120.949	99.2382
cbr-miR-54d	MIMAT0011496	183.245	77.5653	96.4296
cbr-miR-60	MIMAT0000479	134.57	180.109	232.18
cbr-miR-54a-3p	MIMAT0011478	127.126	61.7893	69.2795
cbr-miR-1817	MIMAT0011486	105.938	446.987	863.185
cbr-miR-2225-3p	MIMAT0011498	105.366	105.173	64.5985
cbr-miR-85	MIMAT0000490	91.0498	31.552	104.855
cbr-miR-84	MIMAT0001311	81.8875	151.187	156.347
cbr-miR-2222	MIMAT0011487	80.7422	52.5867	33.7035
cbr-miR-234	MIMAT0000499	78.4517	78.88	57.1088
cbr-miR-2226-3p	MIMAT0011500	73.2979	13.1467	60.8536
cbr-miR-74a	MIMAT0000483	68.1442	115.691	135.75
cbr-miR-36	MIMAT0001314	65.281	166.963	164.773
cbr-miR-65-5p	MIMAT0011484	46.9565	194.571	131.069
cbr-miR-35e	MIMAT0011468	46.3838	111.747	50.5553
cbr-miR-355	MIMAT0001319	43.5206	82.824	28.0863
cbr-miR-784	MIMAT0004285	40.6574	24.9787	16.8518
cbr-miR-49	MIMAT0000474	40.0848	24.9787	14.9794
cbr-lsy-6	MIMAT0000767	34.931	28.9227	15.9156
cbr-miR-40	MIMAT0001317	32.6405	55.216	47.7467
cbr-miR-2214	MIMAT0011491	30.9226	1.31467	14.0431
cbr-miR-83	MIMAT0001295	23.4782	10.5173	22.469
#red: miRNA altered sequence in both hybrid and JU1421
#green: miRNA altered sequence in JU1421 not hybrid

## Sheet: Sheet1
cbr-miR-57	MIMAT0000477	Caenorhabditis	briggsae	miR-57
cbr-miR-228	MIMAT0000495	Caenorhabditis	briggsae	miR-228
cbr-miR-80	MIMAT0000487	Caenorhabditis	briggsae	miR-80
cbr-miR-82	MIMAT0000489	Caenorhabditis	briggsae	miR-82
cbr-miR-81	MIMAT0000488	Caenorhabditis	briggsae	miR-81
cbr-miR-56-3p	MIMAT0011476	Caenorhabditis	briggsae	miR-56-3p
cbr-miR-90b-3p	MIMAT0011472	Caenorhabditis	briggsae	miR-90b-3p
cbr-miR-90a	MIMAT0000493	Caenorhabditis	briggsae	miR-90a
cbr-miR-45	MIMAT0000470	Caenorhabditis	briggsae	miR-45
cbr-miR-235b-3p	MIMAT0011474	Caenorhabditis	briggsae	miR-235b-3p
cbr-miR-58	MIMAT0000478	Caenorhabditis	briggsae	miR-58
cbr-miR-48	MIMAT0000473	Caenorhabditis	briggsae	miR-48
cbr-let-7	MIMAT0000463	Caenorhabditis	briggsae	let-7
cbr-miR-50	MIMAT0000475	Caenorhabditis	briggsae	miR-50
cbr-miR-52	MIMAT0000476	Caenorhabditis	briggsae	miR-52
cbr-miR-238	MIMAT0011465	Caenorhabditis	briggsae	miR-238
cbr-miR-73b	MIMAT0011464	Caenorhabditis	briggsae	miR-73b
cbr-miR-46	MIMAT0000471	Caenorhabditis	briggsae	miR-46
cbr-miR-55	MIMAT0001310	Caenorhabditis	briggsae	miR-55
cbr-miR-73a	MIMAT0000482	Caenorhabditis	briggsae	miR-73a
cbr-miR-237-5p	MIMAT0011479	Caenorhabditis	briggsae	miR-237-5p
cbr-miR-86	MIMAT0000491	Caenorhabditis	briggsae	miR-86
cbr-miR-47	MIMAT0000472	Caenorhabditis	briggsae	miR-47
cbr-miR-236	MIMAT0000500	Caenorhabditis	briggsae	miR-236
cbr-miR-74b-5p	MIMAT0011501	Caenorhabditis	briggsae	miR-74b-5p
cbr-miR-1	MIMAT0000465	Caenorhabditis	briggsae	miR-1
cbr-miR-2226-5p	MIMAT0011499	Caenorhabditis	briggsae	miR-2226-5p
cbr-miR-241	MIMAT0000501	Caenorhabditis	briggsae	miR-241
cbr-lin-4	MIMAT0000464	Caenorhabditis	briggsae	lin-4
cbr-miR-245	MIMAT0000503	Caenorhabditis	briggsae	miR-245
cbr-miR-785	MIMAT0004286	Caenorhabditis	briggsae	miR-785
cbr-miR-244	MIMAT0000502	Caenorhabditis	briggsae	miR-244
cbr-miR-51	MIMAT0001297	Caenorhabditis	briggsae	miR-51
cbr-miR-71	MIMAT0000481	Caenorhabditis	briggsae	miR-71
cbr-miR-79	MIMAT0000486	Caenorhabditis	briggsae	miR-79
cbr-miR-64a	MIMAT0001292	Caenorhabditis	briggsae	miR-64a
cbr-miR-65-3p	MIMAT0011485	Caenorhabditis	briggsae	miR-65-3p
cbr-miR-77	MIMAT0000485	Caenorhabditis	briggsae	miR-77
cbr-miR-248	MIMAT0000504	Caenorhabditis	briggsae	miR-248
cbr-miR-235a	MIMAT0004295	Caenorhabditis	briggsae	miR-235a
cbr-miR-233	MIMAT0000498	Caenorhabditis	briggsae	miR-233
cbr-miR-231	MIMAT0001293	Caenorhabditis	briggsae	miR-231
cbr-miR-242	MIMAT0004296	Caenorhabditis	briggsae	miR-242
cbr-miR-34	MIMAT0000466	Caenorhabditis	briggsae	miR-34
cbr-miR-787	MIMAT0004288	Caenorhabditis	briggsae	miR-787
cbr-miR-232	MIMAT0000497	Caenorhabditis	briggsae	miR-232
cbr-miR-54d	MIMAT0011496	Caenorhabditis	briggsae	miR-54d
cbr-miR-60	MIMAT0000479	Caenorhabditis	briggsae	miR-60
cbr-miR-54a-3p	MIMAT0011478	Caenorhabditis	briggsae	miR-54a-3p
cbr-miR-1817	MIMAT0011486	Caenorhabditis	briggsae	miR-1817
cbr-miR-2225-3p	MIMAT0011498	Caenorhabditis	briggsae	miR-2225-3p
cbr-miR-85	MIMAT0000490	Caenorhabditis	briggsae	miR-85
cbr-miR-84	MIMAT0001311	Caenorhabditis	briggsae	miR-84
cbr-miR-2222	MIMAT0011487	Caenorhabditis	briggsae	miR-2222
cbr-miR-234	MIMAT0000499	Caenorhabditis	briggsae	miR-234
cbr-miR-2226-3p	MIMAT0011500	Caenorhabditis	briggsae	miR-2226-3p
cbr-miR-74a	MIMAT0000483	Caenorhabditis	briggsae	miR-74a
cbr-miR-36	MIMAT0001314	Caenorhabditis	briggsae	miR-36
cbr-miR-65-5p	MIMAT0011484	Caenorhabditis	briggsae	miR-65-5p
cbr-miR-35e	MIMAT0011468	Caenorhabditis	briggsae	miR-35e
cbr-miR-355	MIMAT0001319	Caenorhabditis	briggsae	miR-355
cbr-miR-784	MIMAT0004285	Caenorhabditis	briggsae	miR-784
cbr-miR-49	MIMAT0000474	Caenorhabditis	briggsae	miR-49
cbr-lsy-6	MIMAT0000767	Caenorhabditis	briggsae	lsy-6
cbr-miR-40	MIMAT0001317	Caenorhabditis	briggsae	miR-40
cbr-miR-2214	MIMAT0011491	Caenorhabditis	briggsae	miR-2214
cbr-miR-83	MIMAT0001295	Caenorhabditis	briggsae	miR-83
